# Supplementary material for: Drilling Response of Carbon Fabric/Solid Lubricant Filler/Epoxy Hybrid Composites: An Experimental Investigation
Source: MDPI journal article supplement (doi:10.3390/jcs7020046), 2023-01-23
Supplement: s1 [file s1]

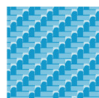

# Supplementary Materials: Drilling Response of Carbon Fabric/Solid Lubricant Filler/Epoxy Hybrid Composites: An Experimental Investigation

Yermal Shirraj Rao, Nanjangud Subbarao Mohan \*, Nagaraja Shetty and Subash Acharya \*

Department of Mechanical and Industrial Engineering, Manipal Institute of Technology, Manipal Academy of Higher Education, Manipal 576104, India

\* Correspondence: ns.mohan@manipal.edu (N.S.M.); subash.acharya@manipal.edu (S.A.)

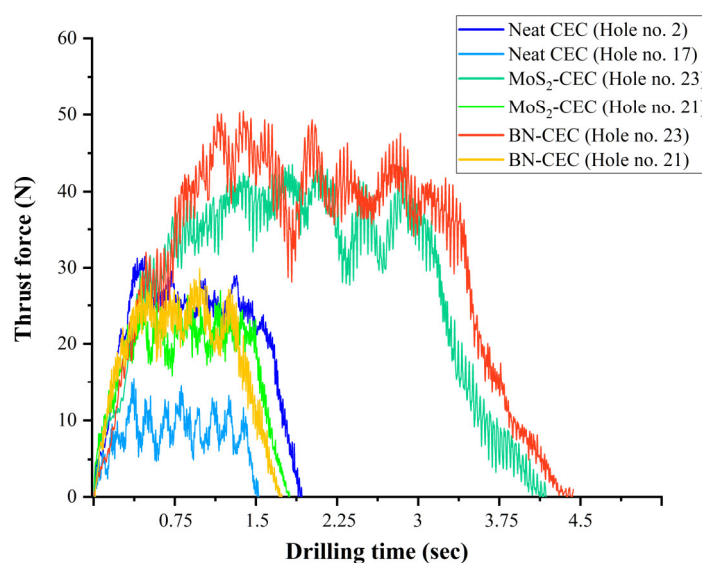

Figure S1. Variation of thrust force with drilling time.

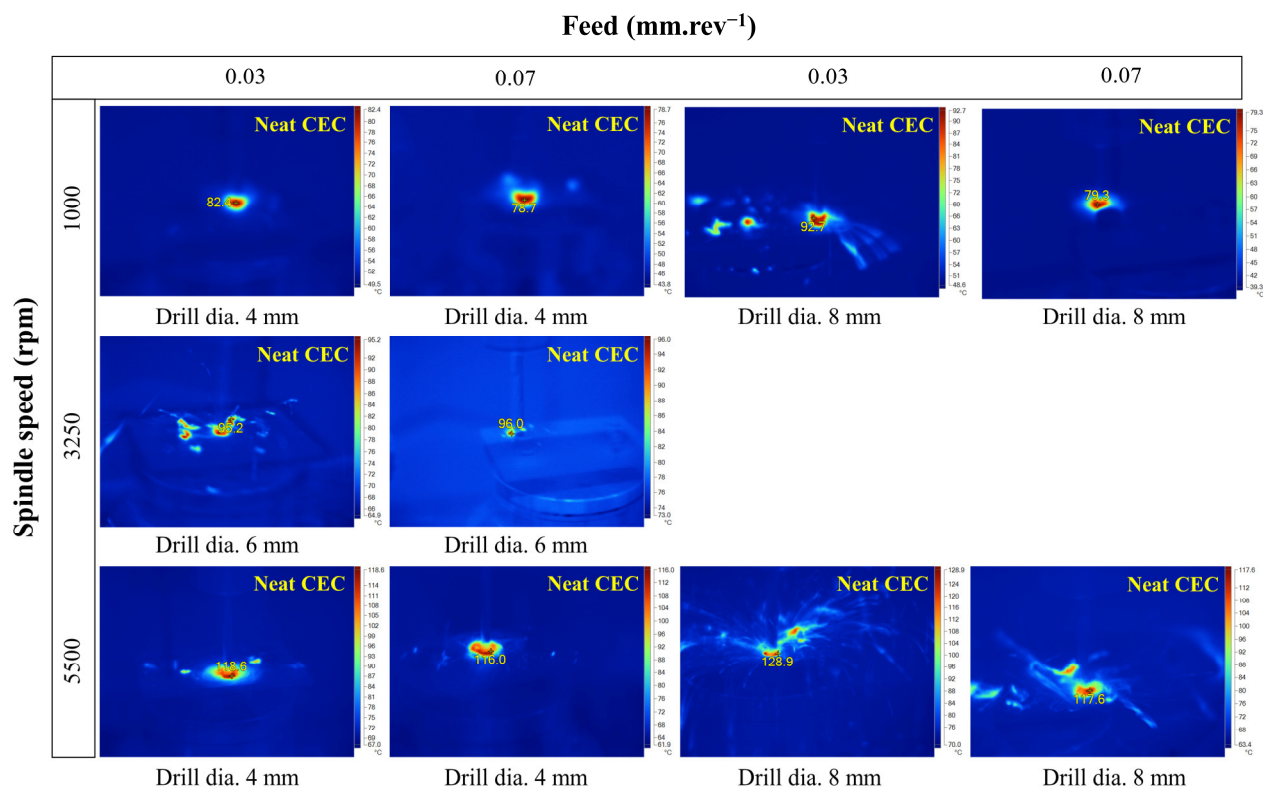

**Figure S2.** IR thermal images of neat CEC under various drilling conditions.

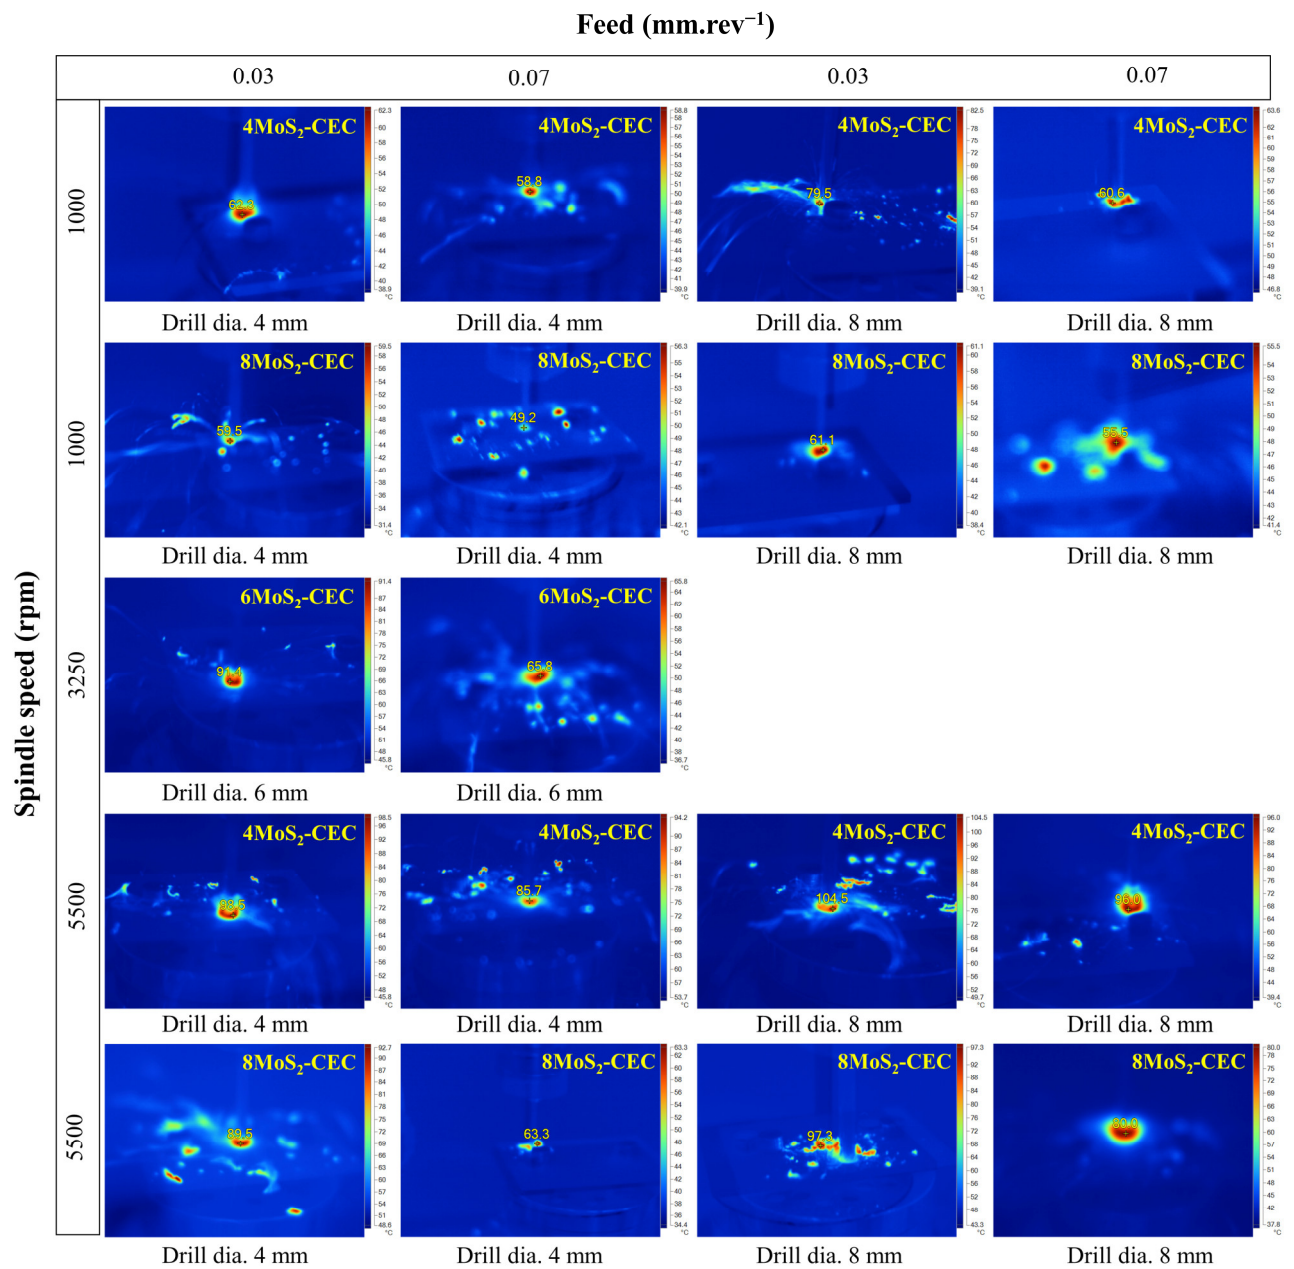

**Figure S3.** IR thermal images of MoS<sub>2</sub>-loaded CEC under different drilling conditions.

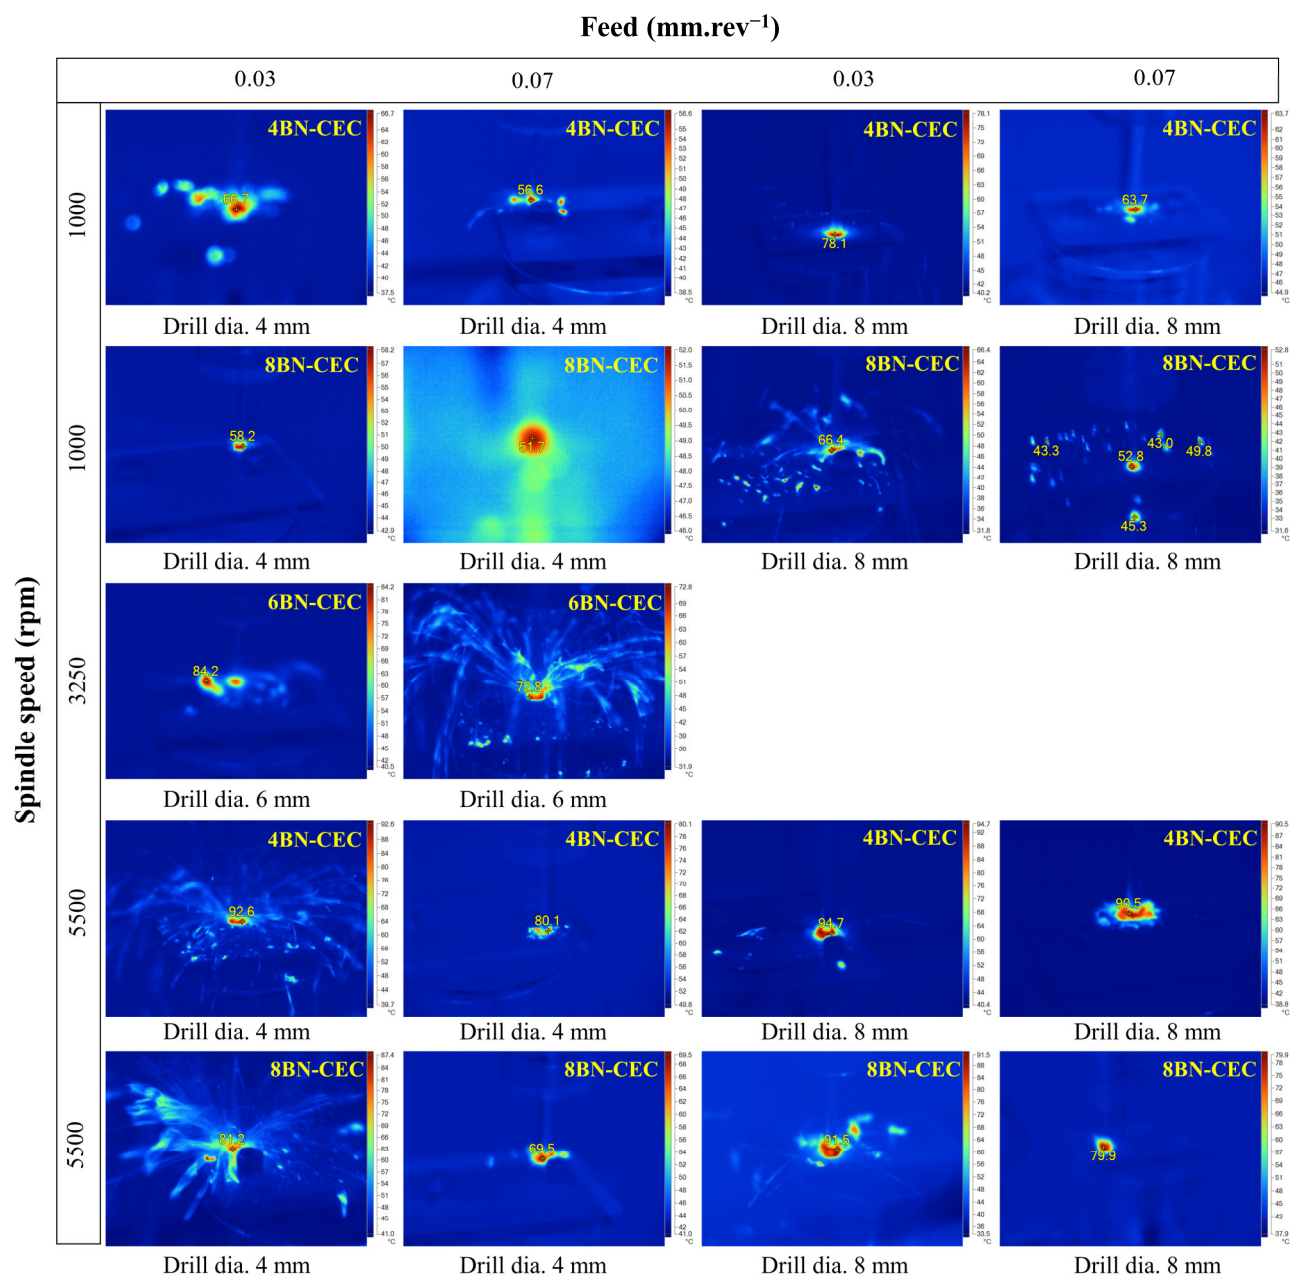

Figure S4. IR thermal images of h-BN-loaded CEC under different drilling conditions.

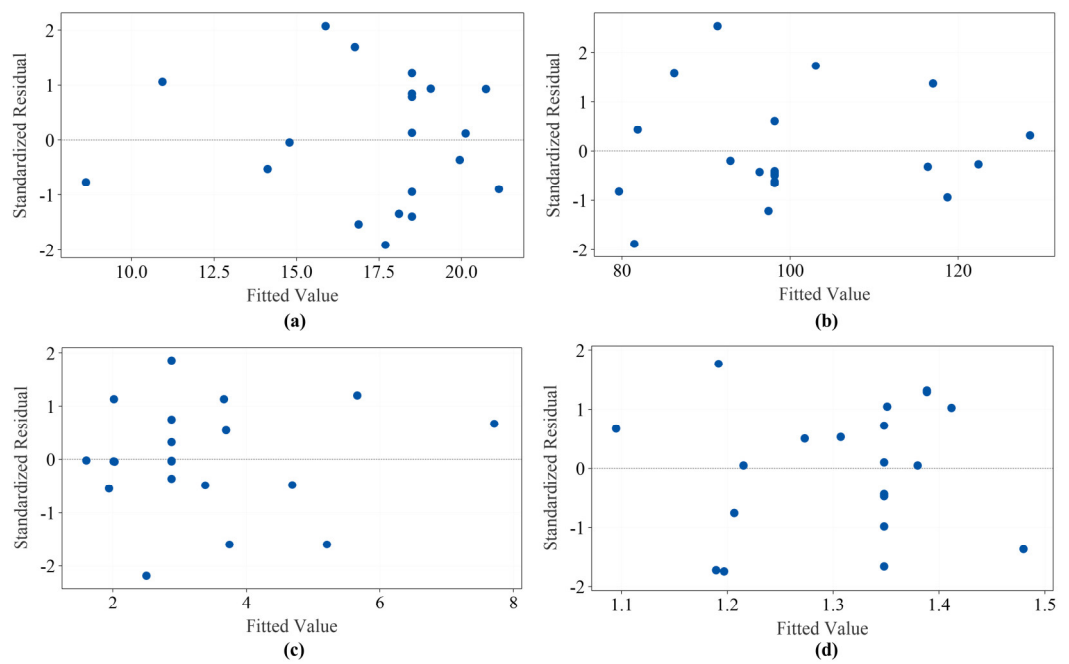

**Figure S5.** Standardized residuals versus fitted value of neat CEC (a) thrust force; (b) temperature; (c) surface roughness and (d) delamination factor.

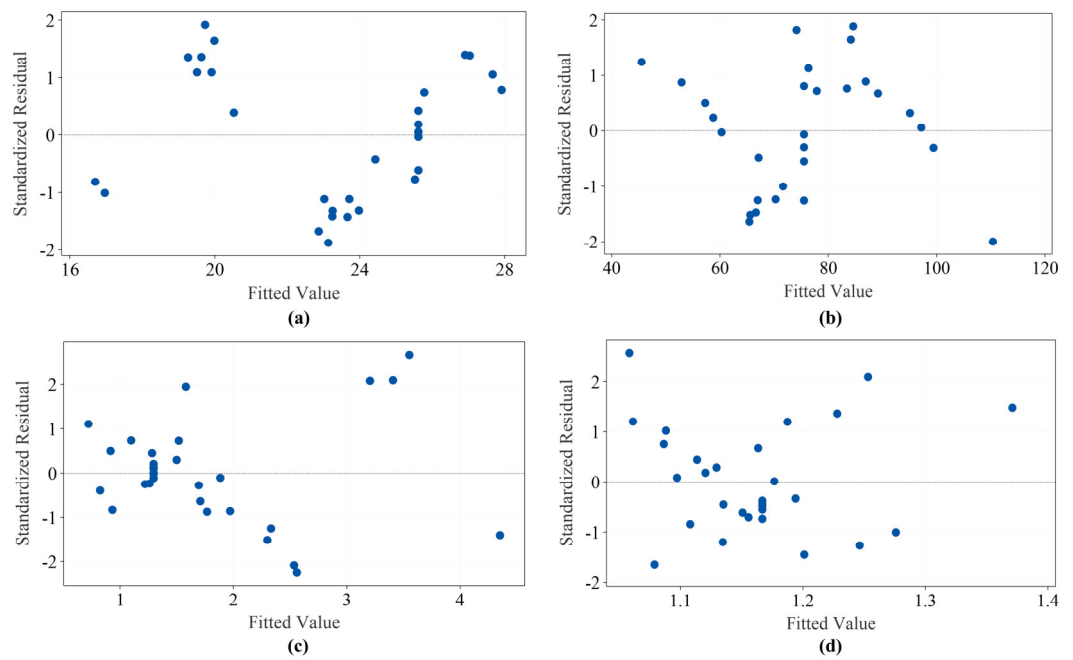

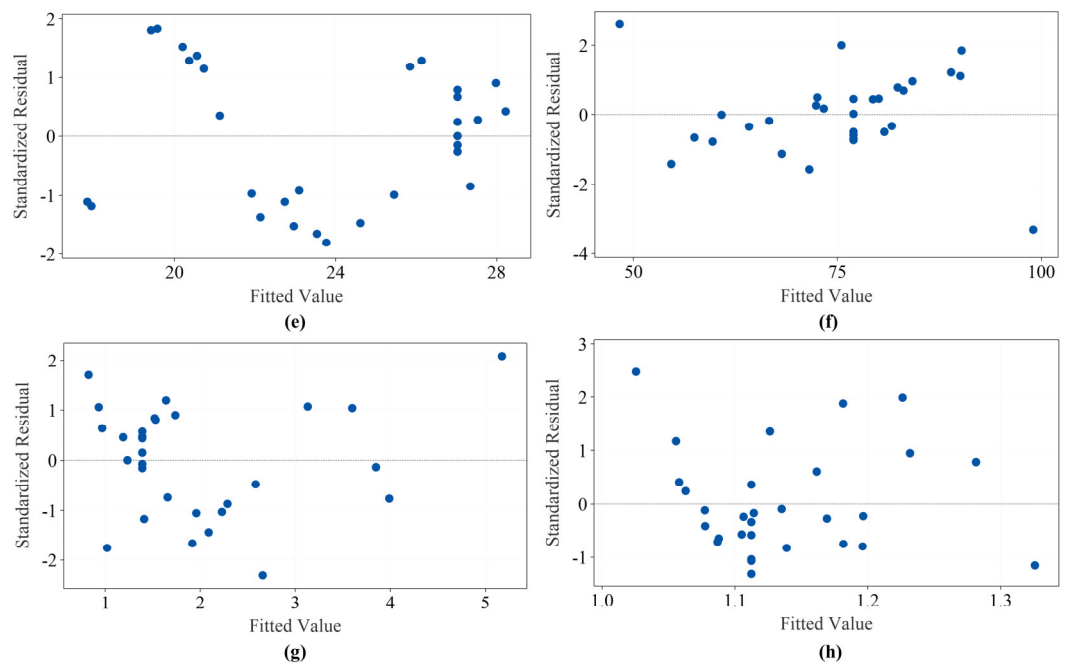

**Figure S6.** Standardized residuals versus fitted value of MoS<sub>2</sub>-loaded CEC (a) thrust force; (b) temperature; (c) surface roughness; (d) delamination factor; standardized residuals versus fitted value of h-BN-loaded CEC (e) thrust force; (f) temperature; (g) surface roughness and (h) delamination factor.

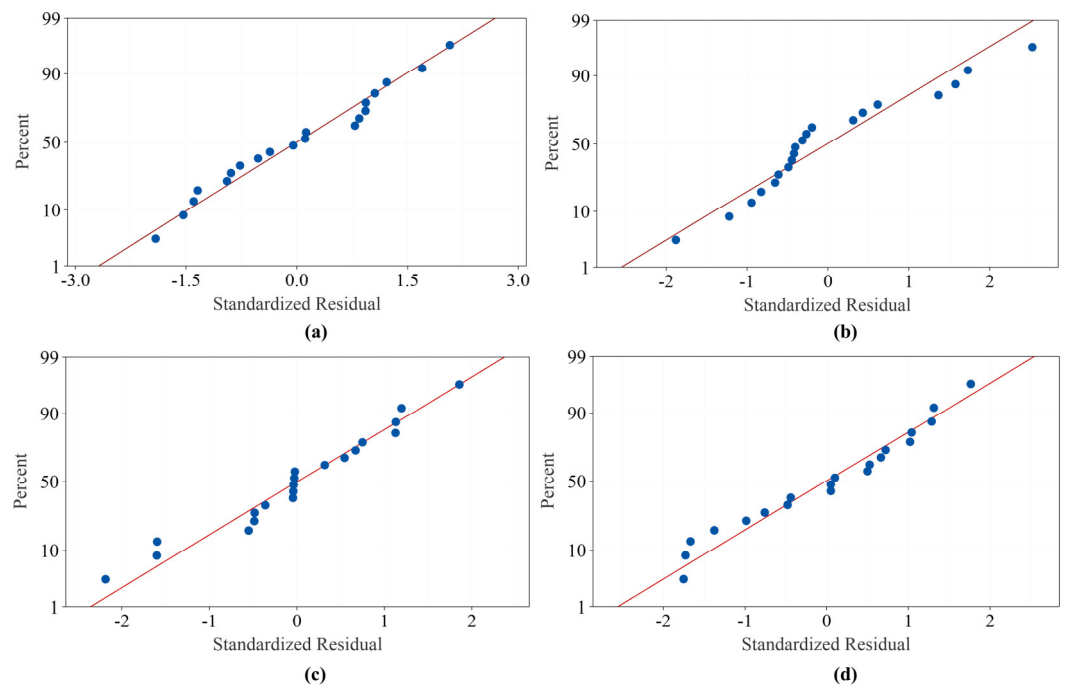

**Figure S7.** NPP of residual of neat CEC (a) thrust force; (b) temperature; (c) surface roughness and (d) delamination factor.



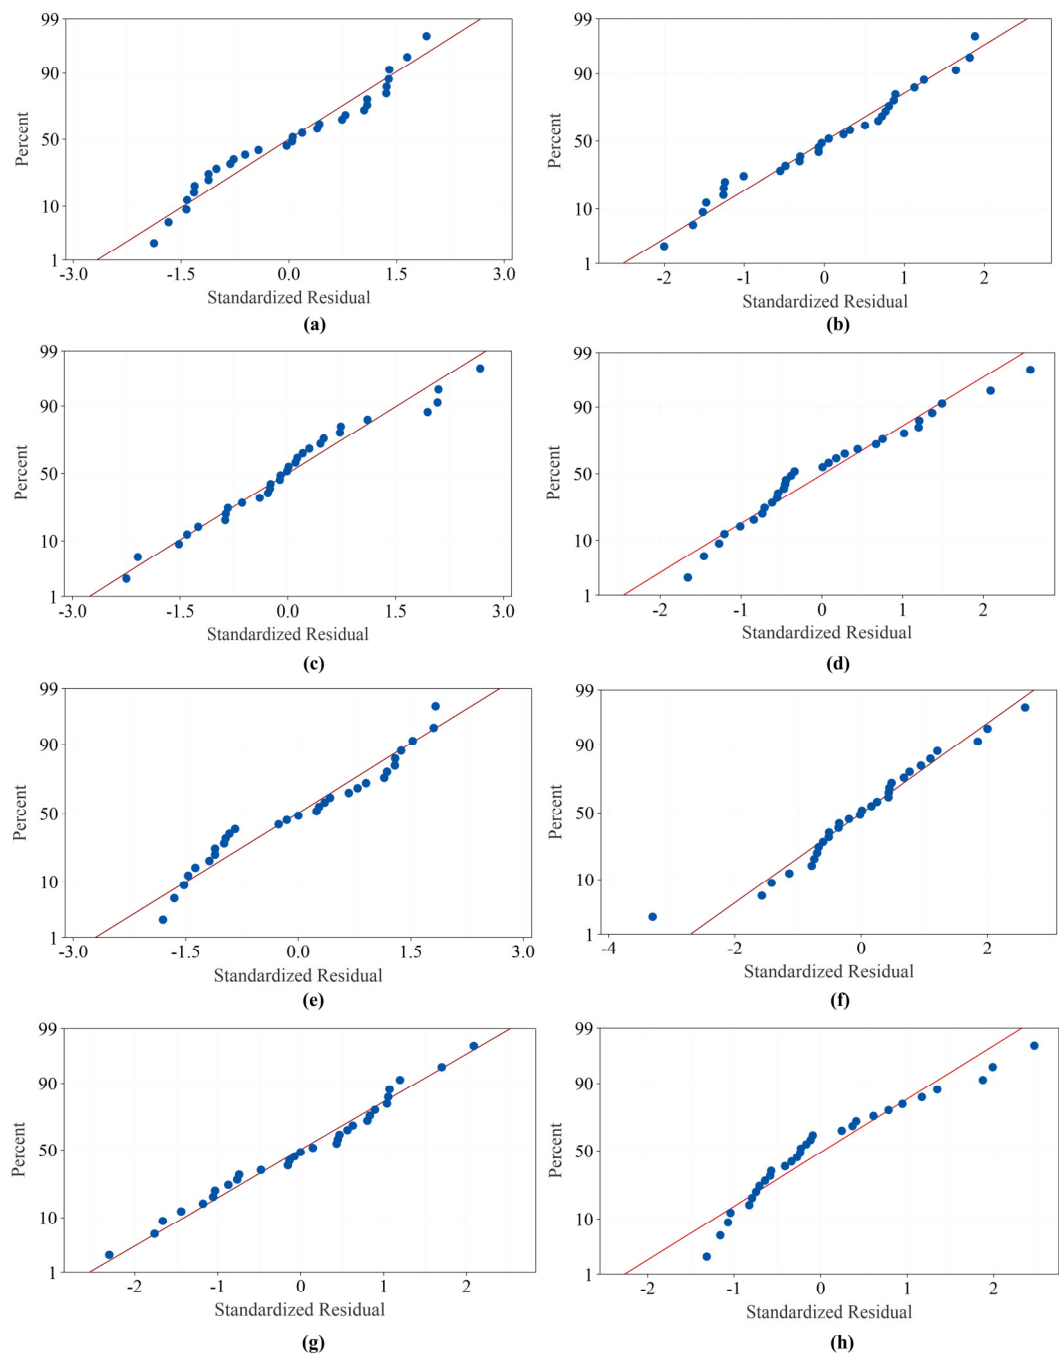

**Figure S8.** NPP of residual of MoS<sub>2</sub>-loaded CEC (a) thrust force; (b) temperature; (c) surface roughness; (d) delamination factor; NPP of residual of h-BN-loaded CEC (e) thrust force; (f) temperature; (g) surface roughness and (h) delamination factor.
